# Supplementary material
Source: MDPI journal article supplement (https://www.mdpi.com/2073-4441/13/20/2919)
Supplement: s1 [file s1]

# Supplementary Materials for

## Discharge and Temperature Controls of Dissolved Organic Matter (DOM) in a Forested Coastal Plain Stream

YueHan Lu<sup>1,2,\*</sup>, Peng Shang<sup>1</sup>, Shuo Chen<sup>1</sup>, Yingxun Du<sup>3</sup>, Marco Bonizzoni<sup>2,4</sup>  
and Amelia K. Ward<sup>5</sup>

1 Molecular Eco-Geochemistry (MEG) Laboratory, Department of Geological Sciences,  
University of Alabama, Tuscaloosa, AL 35487, USA; pshang1@crimson.ua.edu (P.S.);  
schen83@crimson.ua.edu (S.C.)

2 Alabama Water Institute, University of Alabama, Tuscaloosa, AL 35487, USA

3 State Key Laboratory of Lake Science and Environment, Nanjing Institute of Geography  
and Limnology, Chinese Academy of Sciences, Nanjing 210008, China; yxdu@niglas.ac.cn

4 Department of Chemistry & Biochemistry, University of Alabama,  
Tuscaloosa, AL 35487, USA; marco.bonizzoni@ua.edu

5 Department of Biological Sciences, University of Alabama, Tuscaloosa, AL 35487, USA;  
award@ua.edu

\* Correspondence: Yuehan.lu@ua.edu

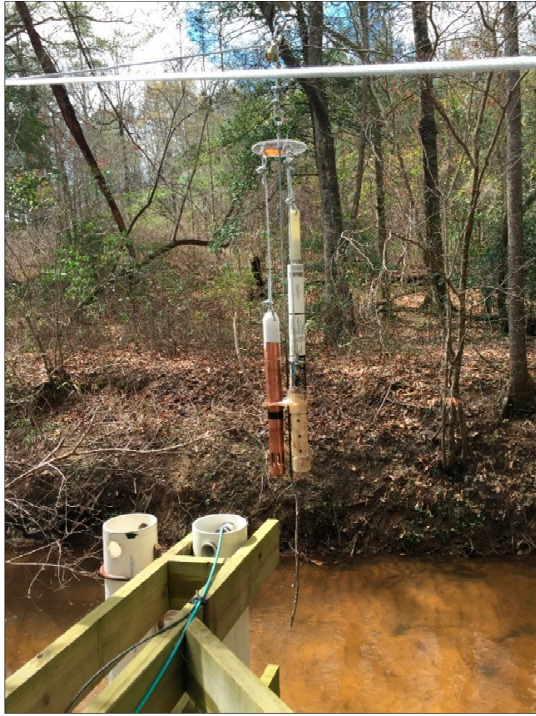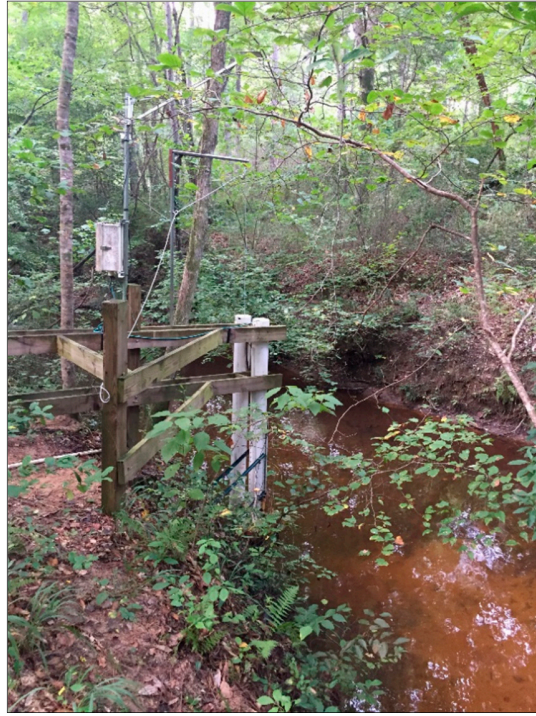

Supplementary Figure S1: Mayfield Creek and in situ sensors

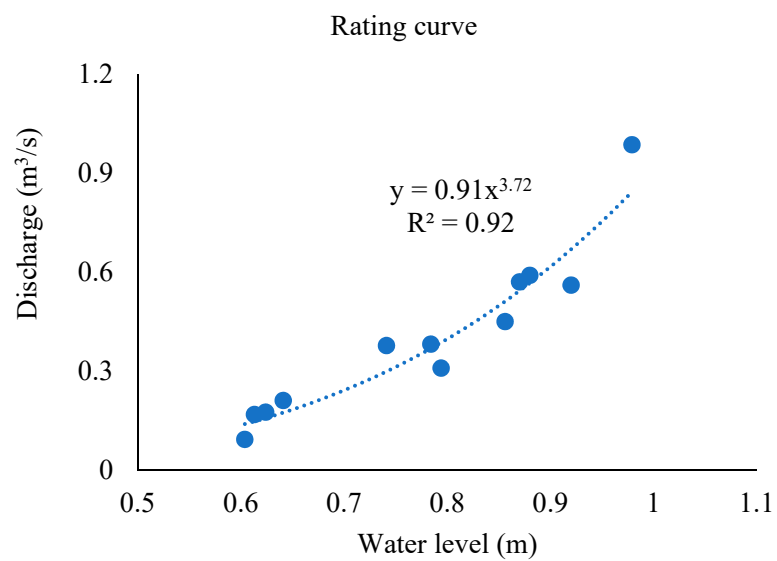

Supplementary Figure S2: Rating curve in the Mayfield Creek.

Supplementary Table S1: Hydrological and nutrient parameters of the Mayfield Creek

| Date<br>(m/d/y) | Q<br>(m <sup>3</sup> /s) | Temp<br>(C) | $\delta^{18}\text{O}$<br>(‰) | $\delta^2\text{H}$<br>(‰) | Si<br>(mg/L) | Na<br>(mg/L) | Nitrate<br>(ug/L) | Ammonia<br>(ug/L) | Phosphate<br>(ug/L) |
|-----------------|--------------------------|-------------|------------------------------|---------------------------|--------------|--------------|-------------------|-------------------|---------------------|
| 9/13/2015       | 0.1                      | 19.28       | -4.05                        | -18.59                    | 4.42         | 0.91         | 18.7              | 7.64              | 1.89                |
| 9/17/2015       | 0.09                     | 20.81       | -4.17                        | -18.64                    | 4.6          | 0.78         | 9.66              | 9.21              | 1.63                |
| 9/20/2015       | 0.08                     | 20.42       | -4.19                        | -18.01                    | 4.54         | 0.9          | 13.5              | 9.9               | 1.59                |
| 9/24/2015       | 0.09                     | 21.28       | -4.18                        | -18.6                     | 4.56         | 0.71         | 10.6              | 3.19              | 2.9                 |
| 10/1/2015       | 0.06                     | 20.33       | -4.37                        | -19.07                    | 4.84         | 0.75         | 7.01              | 5.29              | 2.23                |
| 10/4/2015       | 0.07                     | 16.43       | -4.32                        | -19.34                    | 4.53         | 0.82         | 8.05              | 2.62              | 1.83                |
| 10/8/2015       | 0.1                      | 21.86       | -4.42                        | -20.43                    | 4.61         | 0.8          | 8.65              | 3.15              | 1.75                |
| 10/15/2015      | 0.11                     | 17.09       | -4.28                        | -19.79                    | 4.66         | 0.82         | 5.03              | 0.516             | 1.3                 |
| 10/22/2015      | 0.14                     | 17.95       | -4.28                        | -19.88                    | 4.51         | 0.76         | 3.71              | 3.04              | 1.08                |
| 10/29/2015      | 0.1                      | 18.52       | -4.13                        | -18.46                    | 4.63         | 0.87         | 5.73              | 2.79              | 1.94                |
| 11/5/2015       | 0.16                     | 20.04       | -4.5                         | -19.74                    | 4.68         | 0.95         | 5.19              | 2.34              | 0.984               |
| 11/15/2015      | 0.22                     | 11.04       | -4.28                        | -19.85                    | 4.46         | 0.85         | 5.15              | 4.06              | 1.59                |
| 11/19/2015      | 0.29                     | 16.52       | -4.51                        | -20.44                    | 4.08         | 0.91         | 4.71              | 10.7              | 1.98                |
| 12/6/2015       | 0.36                     | 9.57        | -4.15                        | -17.59                    | 4.31         | 1.1          | 11.6              | 65.1              | 2.9                 |
| 12/13/2015      | 0.11                     | 15.66       | -4.12                        | -17.26                    | 4.35         | 1.19         | 4.78              | 20.3              | 2.11                |
| 12/20/2015      | 0.38                     | 6.67        | -4.07                        | -16.67                    | 4.48         | 1.15         | 8.68              | 48.6              | 1.88                |
| 12/27/2015      | 0.54                     | 18.52       | -3.8                         | -14.79                    | 3.42         | 1.03         | 17                | 22                | 2.14                |
| 12/29/2015      | 0.54                     | 15.38       | -3.73                        | -14.22                    | 3.45         | 1.04         | 18.4              | 15.2              | 2.67                |
| 1/17/2016       | 0.2                      | 8.98        | -4.16                        | -17.58                    | 3.84         | 1.04         | 8.99              | 20.4              | 1.69                |
| 1/22/2016       | 0.35                     | 9.87        | -4.25                        | -16.41                    | 3.1          | 0.94         | 28.4              | 16.2              | 2.71                |
| 2/11/2016       | 0.41                     | 7.98        | -3.94                        | -16.82                    | 3.38         | 0.96         | 7.17              | 22.1              | 4.06                |
| 2/25/2016       | 0.71                     | 12.59       | -3.96                        | -16.35                    | 3.16         | 0.95         | 7.86              | 13.7              | 1.95                |
| 3/6/2016        | 0.6                      | 14.04       | -3.88                        | -15.41                    | 3.15         | 0.95         | 6.21              | 12.3              | 1.99                |
| 3/17/2016       | 0.3                      | 18.24       | -3.89                        | -15.46                    | 3.33         | 1.01         | 6.35              | 11.4              | 1.89                |
| 4/10/2016       | 0.41                     | 16.9        | -3.74                        | -15.68                    | 3.34         | 1            | 5.52              | 11.4              | 1.98                |
| 4/26/2016       | 0.25                     | 19.28       | -3.91                        | -16.02                    | 3.59         | 1.38         | 6.3               | 9.92              | 2.15                |
| 5/8/2016        | 0.24                     | 19.38       | -3.81                        | -15.95                    | 3.57         | 1            | 9.99              | 24.6              | 3.28                |
| 5/15/2016       | 0.4                      | 18.24       | -3.91                        | -17.1                     | 3.71         | 1.05         | 7.61              | 37.2              | 2.15                |

|           |      |       |       |        |      |      |      |      |      |
|-----------|------|-------|-------|--------|------|------|------|------|------|
| 5/22/2016 | 0.32 | 20.04 | -4    | -17.38 | 3.82 | 1.07 | 9.73 | 27.1 | 2.1  |
| 5/29/2016 | 0.34 | 22.24 | -4.01 | -17.96 | 3.87 | 1.09 | 14.1 | 36.3 | 3.54 |
| 6/19/2016 | 0.38 | 26.78 | -3.89 | -16.36 | 3.9  | 1    | 33.2 | 26   | 1.98 |
| 6/26/2016 | 0.2  | 24.74 | -3.99 | -17.33 | 4.26 | 1.12 | 21.3 | 26.6 | 1.86 |
| 7/6/2016  | 0.19 | 25.51 | -4.02 | -17.31 | 4.32 | 1.07 | 21.6 | 32.5 | 3.54 |
| 7/16/2016 | 0.24 | 23.97 | -3.79 | -16.05 | 4.29 | 1.1  | 33.5 | 22.1 | 3.02 |
| 7/27/2016 | 0.18 | 25.03 | -4.13 | -18.18 | 4.54 | 1.09 | 20.5 | 19.4 | 1.86 |

---

Supplementary Table S2: DOM parameters of the Mayfield Creek

| Date<br>(d/m/y) | DOC<br>(mg/L) | SUVA <sub>254</sub><br>(L mg <sup>-1</sup> m <sup>-1</sup> ) | SR   | HIX   | BIX  | FI   | C1<br>(R.U.) | C2<br>(R.U.) | C3<br>(R.U.) | C4<br>(R.U.) | C1%   | C2%   | C3%   | C4%   |
|-----------------|---------------|--------------------------------------------------------------|------|-------|------|------|--------------|--------------|--------------|--------------|-------|-------|-------|-------|
| 9/13/2015       | 2.26          | 2.99                                                         | 0.78 | 6.36  | 0.56 | 1.62 | 1.81         | 1.35         | 0.47         | 0.77         | 41.18 | 30.62 | 10.61 | 17.59 |
| 9/17/2015       | 1.65          | 2.99                                                         | 0.83 | 5.43  | 0.65 | 1.56 | 1.41         | 0.86         | 0.25         | 3.76         | 22.5  | 13.65 | 4     | 59.86 |
| 9/20/2015       | 1.66          | 2.99                                                         | 0.88 | 9.63  | 0.52 | 1.62 | 1.41         | 1.01         | 0.31         | 0            | 51.74 | 36.96 | 11.3  | 0     |
| 9/24/2015       | 1.86          | 2.98                                                         | 0.84 | 8.44  | 0.59 | 1.58 | 1.53         | 1.17         | 0.59         | 0.47         | 40.68 | 31.2  | 15.57 | 12.56 |
| 10/1/2015       | 1.99          | 3.39                                                         | 0.75 | 16.05 | 0.52 | 1.58 | 1.44         | 0.93         | 0.08         | 0            | 58.87 | 37.96 | 3.17  | 0     |
| 10/4/2015       | 1.62          | 2.87                                                         | 0.76 | 9.24  | 0.78 | 1.6  | 1.33         | 1.34         | 0.89         | 3.24         | 19.58 | 19.74 | 13.08 | 47.61 |
| 10/8/2015       | 1.84          | 2.89                                                         | 0.75 | 12.76 | 0.59 | 1.63 | 1.41         | 0.96         | 0.06         | 1.09         | 40.17 | 27.26 | 1.74  | 30.83 |
| 10/15/2015      | 1.79          | 2.74                                                         | 0.8  | 3.78  | 0.93 | 1.71 | 0.9          | 1.25         | 0.56         | 0.37         | 29.2  | 40.62 | 18.22 | 11.96 |
| 10/22/2015      | 1.42          | 2.65                                                         | 0.86 | 3.59  | 0.93 | 1.75 | 0.68         | 0.96         | 0.48         | 0.12         | 30.36 | 42.75 | 21.41 | 5.47  |
| 10/29/2015      | 4.12          | 2.69                                                         | 0.83 | 3.46  | 0.91 | 1.7  | 1.75         | 2.38         | 1.32         | 0.49         | 29.47 | 40.08 | 22.16 | 8.29  |
| 11/5/2015       | 3.74          | 2.96                                                         | 0.88 | 3.97  | 0.95 | 1.7  | 1.88         | 2.56         | 1.07         | 0.72         | 30.16 | 41.12 | 17.1  | 11.62 |
| 11/15/2015      | 2.04          | 2.48                                                         | 1.02 | 2.55  | 1.08 | 1.8  | 0.74         | 1.19         | 0.76         | 0.32         | 24.62 | 39.46 | 25.37 | 10.56 |
| 11/19/2015      | 4.14          | 2.44                                                         | 0.8  | 3.69  | 1.13 | 1.79 | 1.53         | 2.27         | 0.8          | 0.59         | 29.52 | 43.69 | 15.35 | 11.44 |
| 12/6/2015       | 2.03          | 2                                                            | 1.2  | 1.7   | 1.23 | 1.82 | 0.54         | 0.93         | 0.81         | 0.35         | 20.47 | 35.51 | 30.88 | 13.14 |
| 12/13/2015      | 1.99          | 2.55                                                         | 0.77 | 3.3   | 1.01 | 1.73 | 0.92         | 1.3          | 0.57         | 0.66         | 26.7  | 37.64 | 16.54 | 19.12 |
| 12/20/2015      | 1.68          | 2.14                                                         | 0.8  | 2.72  | 1.03 | 1.75 | 0.67         | 0.97         | 0.47         | 0.73         | 23.53 | 34.1  | 16.65 | 25.71 |
| 12/27/2015      | 3.04          | 3.18                                                         | 0.79 | 3.59  | 0.98 | 1.7  | 1.28         | 1.69         | 0.74         | 0.5          | 30.39 | 40.23 | 17.52 | 11.87 |
| 12/29/2015      | 2.77          | 3.4                                                          | 0.8  | 3.35  | 0.99 | 1.71 | 1.23         | 1.63         | 0.69         | 0.97         | 27.29 | 36    | 15.17 | 21.55 |
| 1/17/2016       | 1.78          | 2.08                                                         | 0.81 | 2.84  | 1    | 1.68 | 0.63         | 0.89         | 0.45         | 0.66         | 24.13 | 33.83 | 17.08 | 24.95 |
| 1/22/2016       | 4.47          | 2.64                                                         | 0.75 | 3.7   | 0.98 | 1.7  | 1.37         | 1.76         | 0.72         | 0.75         | 29.88 | 38.22 | 15.69 | 16.22 |
| 2/11/2016       | 1.45          | 1.97                                                         | 0.77 | 3.35  | 0.99 | 1.71 | 0.47         | 0.67         | 0.29         | 0.24         | 28.04 | 40.11 | 17.25 | 14.59 |
| 2/25/2016       | 2.13          | 2.21                                                         | 0.83 | 4.4   | 0.99 | 1.72 | 0.72         | 0.98         | 0.31         | 0.26         | 31.65 | 43.16 | 13.74 | 11.45 |
| 3/6/2016        | 1.86          | 1.98                                                         | 0.77 | 3.46  | 0.97 | 1.74 | 0.62         | 0.89         | 0.43         | 0.21         | 28.96 | 41.33 | 19.99 | 9.72  |
| 3/17/2016       | 2.49          | 2.23                                                         | 0.72 | 4.87  | 0.89 | 1.68 | 0.98         | 1.32         | 0.43         | 0.26         | 32.83 | 43.99 | 14.35 | 8.83  |
| 4/10/2016       | 2.35          | 2.06                                                         | 0.71 | 4.11  | 0.91 | 1.68 | 0.88         | 1.19         | 0.48         | 0.3          | 30.89 | 41.72 | 16.85 | 10.53 |
| 4/26/2016       | 2.72          | 2.75                                                         | 0.75 | 3.5   | 0.91 | 1.67 | 1.19         | 1.56         | 0.83         | 0.4          | 29.87 | 39.21 | 20.9  | 10.02 |
| 5/8/2016        | 2.86          | 2.38                                                         | 0.77 | 3.62  | 0.91 | 1.68 | 1.14         | 1.51         | 0.74         | 0.27         | 31.22 | 41.21 | 20.08 | 7.48  |

|           |      |      |      |      |      |      |      |      |      |      |       |       |       |       |
|-----------|------|------|------|------|------|------|------|------|------|------|-------|-------|-------|-------|
| 5/15/2016 | 3.15 | 2.28 | 0.76 | 3.73 | 0.91 | 1.68 | 1.3  | 1.71 | 0.71 | 0.42 | 31.41 | 41.22 | 17.17 | 10.2  |
| 5/22/2016 | 1.99 | 3.44 | 0.76 | 4.43 | 0.91 | 1.66 | 1.29 | 1.68 | 0.69 | 0.35 | 32.05 | 41.98 | 17.14 | 8.83  |
| 5/29/2016 | 1.98 | 3.98 | 0.78 | 4.06 | 0.9  | 1.66 | 1.35 | 1.78 | 0.75 | 0.39 | 31.58 | 41.75 | 17.57 | 9.1   |
| 6/19/2016 | 2.76 | 3.43 | 0.74 | 4.13 | 0.95 | 1.69 | 1.64 | 2.14 | 0.87 | 0.73 | 30.47 | 39.85 | 16.12 | 13.56 |
| 6/26/2016 | 2.23 | 3.43 | 0.75 | 5.34 | 0.9  | 1.67 | 1.45 | 1.9  | 0.6  | 0.4  | 33.35 | 43.67 | 13.83 | 9.15  |
| 7/6/2016  | 2.04 | 2.75 | 0.71 | 4.36 | 1.01 | 1.81 | 1.03 | 1.53 | 0.45 | 0.33 | 30.75 | 45.73 | 13.51 | 10.01 |
| 7/16/2016 | 2.63 | 3.74 | 0.73 | 4.73 | 0.93 | 1.69 | 1.55 | 2.07 | 0.69 | 0.41 | 32.86 | 43.88 | 14.61 | 8.65  |
| 7/27/2016 | 1.9  | 3.38 | 0.75 | 3.77 | 0.91 | 1.68 | 1.24 | 1.67 | 0.7  | 0.44 | 30.73 | 41.15 | 17.31 | 10.81 |
